# Supplementary material
Source: PubMed Central journal article supplement (PMC1462986)

**Figure S1. (a) Tubes formed from HUVECs regress, despite the continual presence of VEGF-A.** HUVECs were subjected to the tube assay as described in Fig. 1. **(b, c) Activation of PLC $\gamma$  was necessary for regression of HUVEC tubes.** A tube assay was performed with HUVECs expressing WT and Y1175F VEGFR2 (b). Western blot analysis showed that WT and Y1175F VEGFR2 were expressed at similar levels (c).

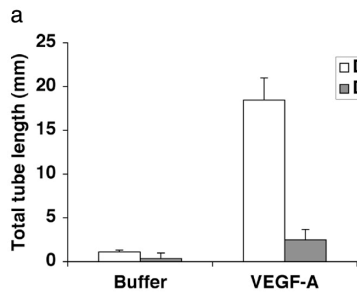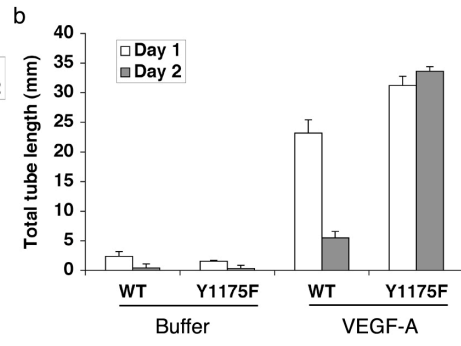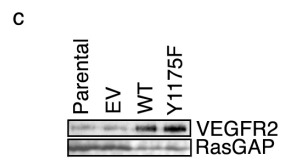

Supplement: 7601100s1.pdf [file 7601100s1.pdf]
