# Supplementary material
Source: PubMed Central journal article supplement (PMC1462986)

**Figure S5. (a) The level of the introduced PDGFR.** Monolayers of BRECs stably expressing the indicated PDGFR construct were lysed, and subjected to Western blot analysis. A “+” and “\*” indicate the immature and mature forms of the receptor, respectively. The blot was then stripped and re-probed with an anti-RasGAP antibody. The normalized level of PDGFR expression was within 3 fold. **(b) The recruitment of p85 to PDGFR.** Monolayers of BRECs stably expressing the indicated PDGFR construct were starved in EBM with 0.2 % HS for 16-18 h. PDGF (10 ng/ml) or buffer was added for 5 min. Total cell lysates were immunoprecipitated with a PDGFR antibody, and subjected to Western blot analysis followed by anti-p85. The blot was then stripped and re-probed with an anti-PDGFR antibody. A arrow indicates p85. **(c) The activation of PLC $\gamma$  after recruitment to PDGFR.** Monolayers of BRECs stably expressing the indicated PDGFR construct were starved in EBM with 0.2 % HS for 16-18 h. PDGF (10 ng/ml) or buffer was added for 5 min. Total cell lysates were immunoprecipitated with a PLC $\gamma$  antibody. The phosphotyrosine content of PLC $\gamma$  was assessed by Western blot analysis using an anti-phosphotyrosine antibody. The blot was then stripped and re-probed with an anti- PLC $\gamma$  antibody.

## Material and Methods

**Antibody.** Rabbit polyclonal anti-p85 antibody was purchased from Upstate Biotechnology Inc (Lake Placid, NY).

a

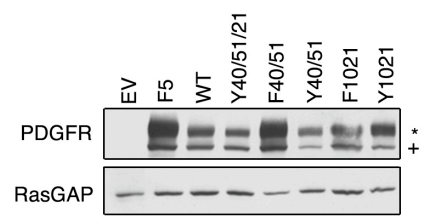

b

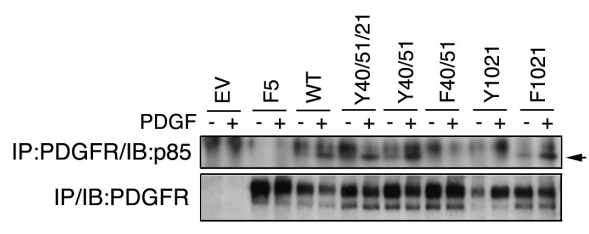

c

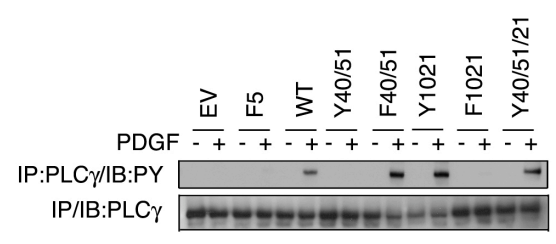

Supplement: 7601100s5.pdf [file 7601100s5.pdf]
